# Supplementary material for: Development of a pediatric obstructive sleep apnea triage algorithm
Source: PubMed Central journal article supplement (PMC8281470; doi:10.1186/s40463-021-00528-8), 2021-07-15

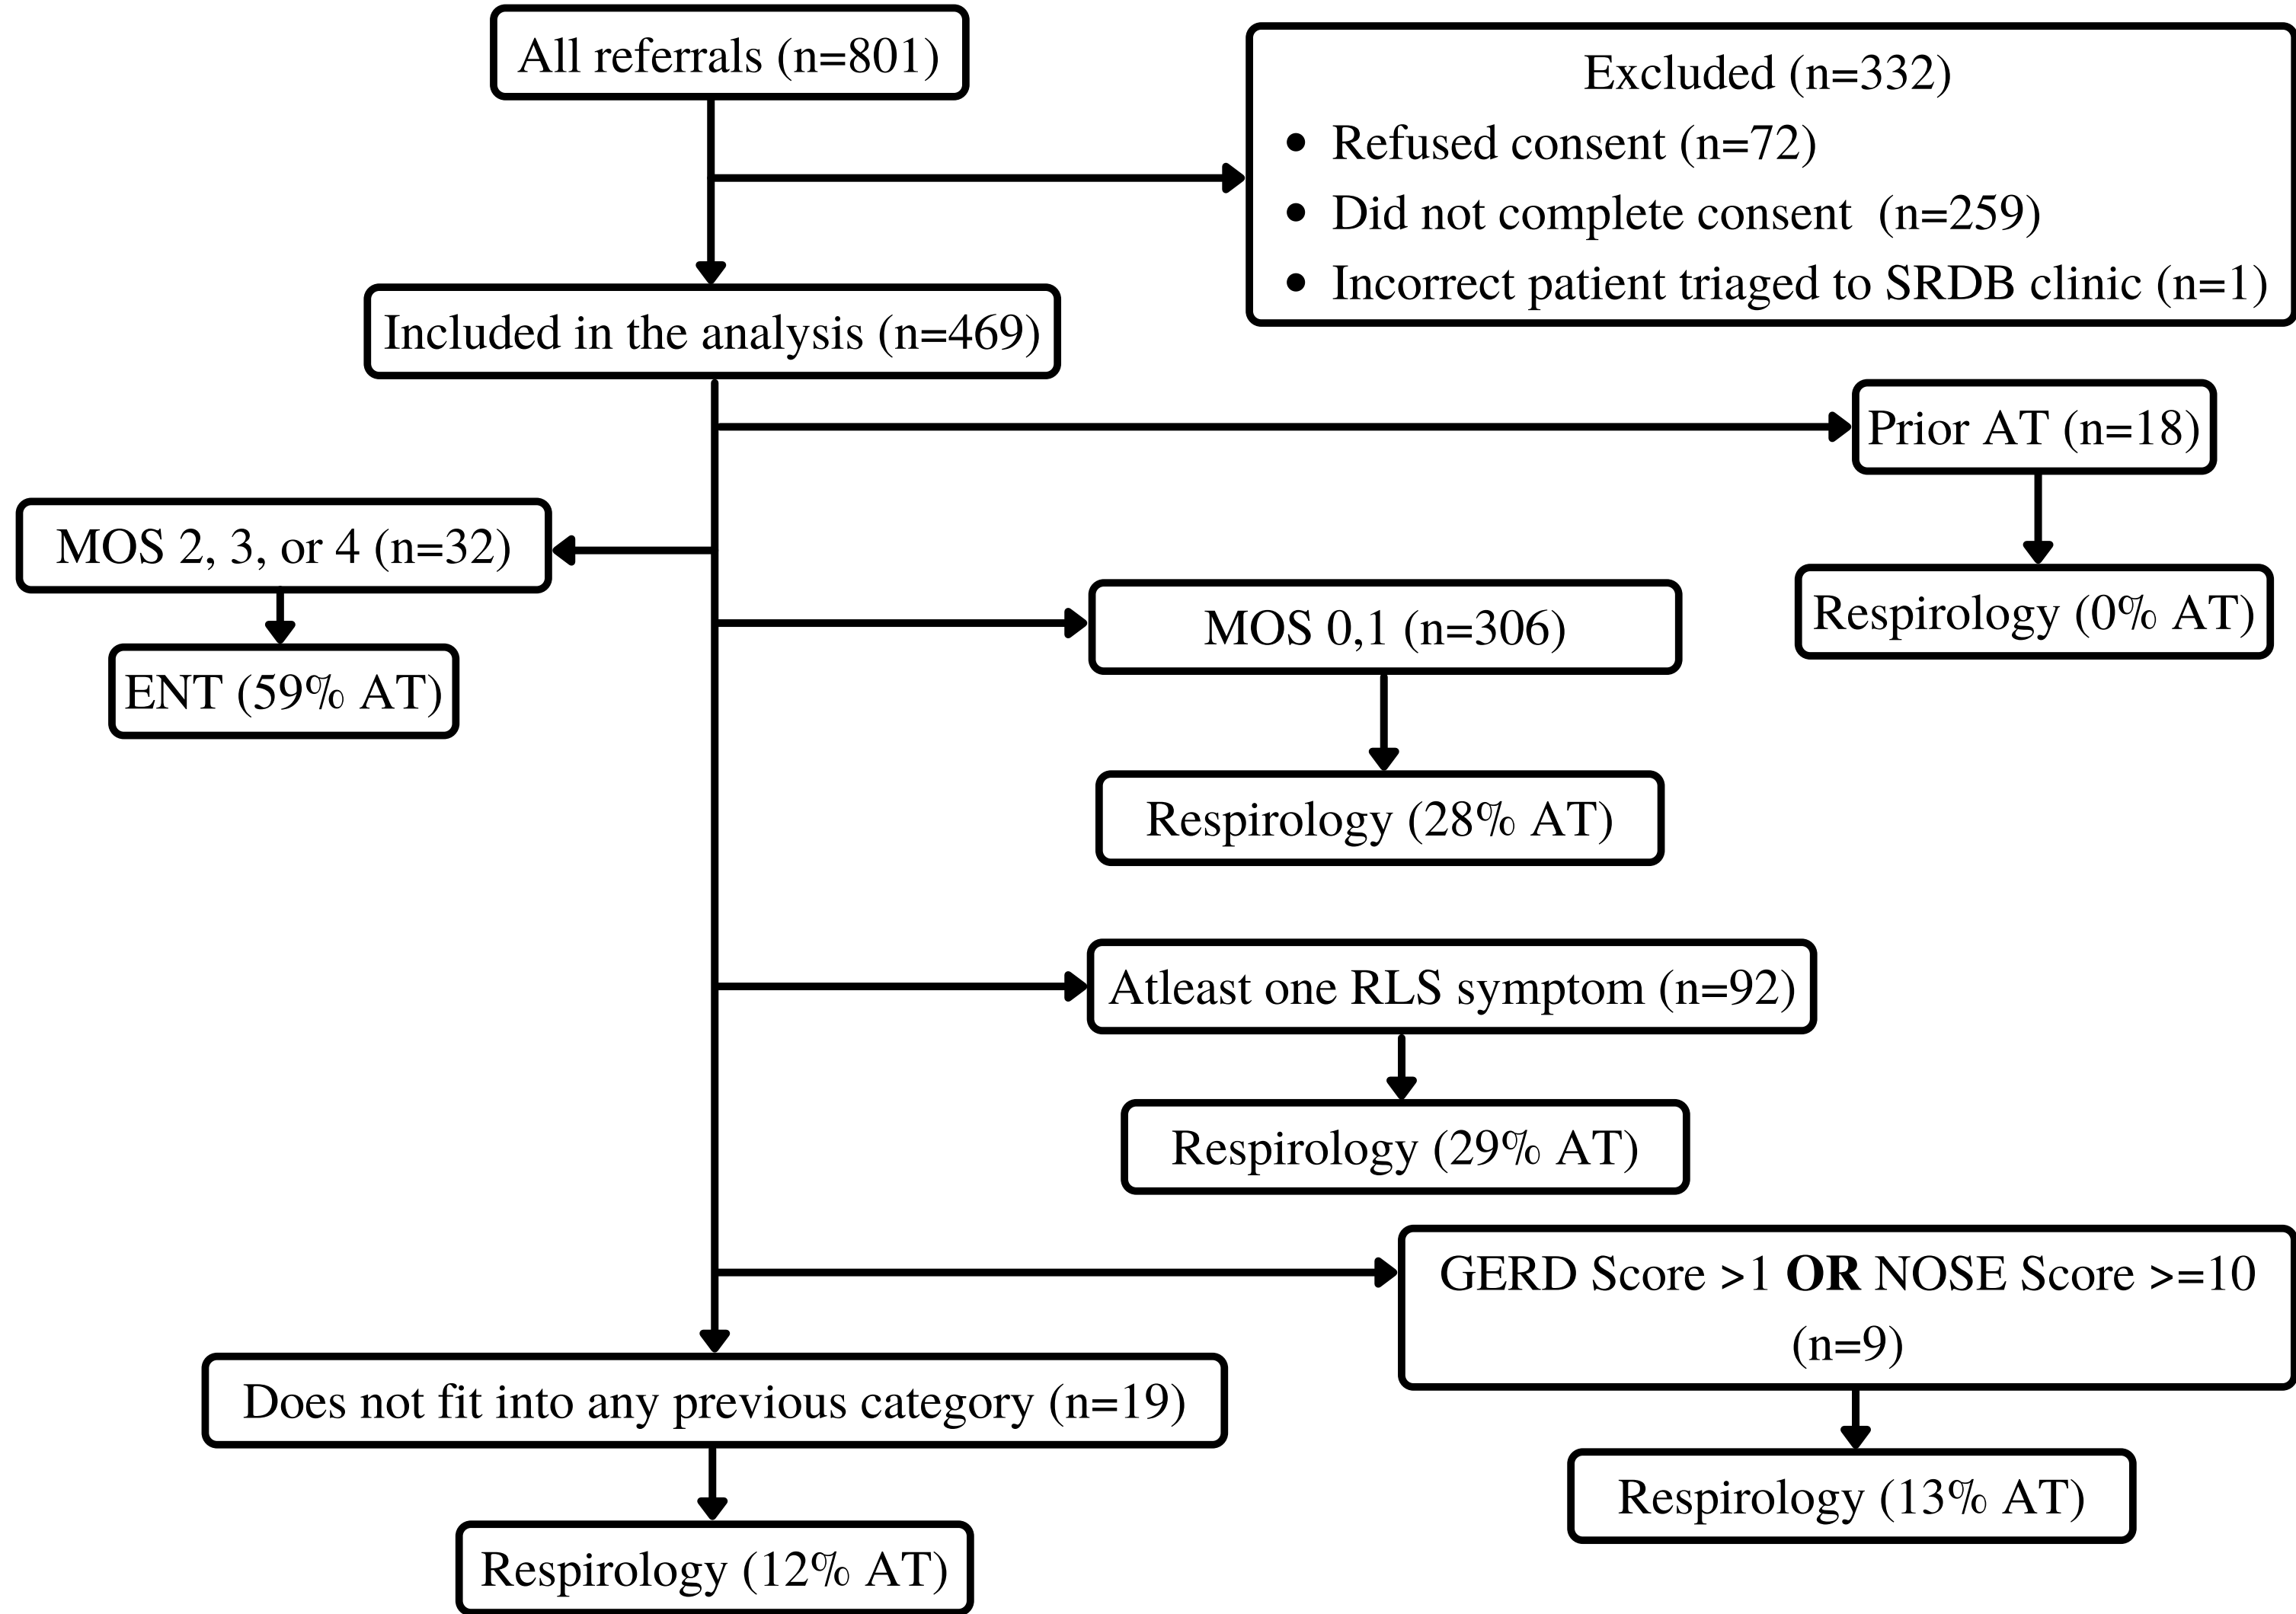

Supplement: 40463_2021_528_MOESM1_ESM.pdf [file 40463_2021_528_MOESM1_ESM.pdf]
